# Supplementary material
Source: PubMed Central journal article supplement (PMC2599805)
Supplement: NIHMS76008-supplement-supplement_1.pdf [file NIHMS76008-supplement-supplement_1.pdf]

Supplementary Table: Median and mean untransformed and unadjusted nicotine metabolite values, by race and sex.

|                                                     | Native Hawaiian<br><i>n</i> =99 | White<br><i>n</i> =99 | Japanese American<br><i>n</i> =97 |
|-----------------------------------------------------|---------------------------------|-----------------------|-----------------------------------|
| <b>Females</b>                                      |                                 |                       |                                   |
| Total nicotine (nmol/mL)                            |                                 |                       |                                   |
| Median (Inter-quartile range)                       | 9.47 (5.01-15.4)                | 7.14 (4.10-10.7)      | 7.46 (4.43-12.1)                  |
| Mean (95% confidence limits)                        | 11.7 (9.80-13.5) <sup>‡</sup>   | 9.71 (7.82-11.6)      | 10.5 (8.46-12.5)                  |
| Total cotinine (nmol/mL)                            |                                 |                       |                                   |
| Median                                              | 13.6 (7.73-20.5) <sup>§</sup>   | 12.6 (7.62-21.0)      | 9.35 (6.02-15.3) <sup>‡</sup>     |
| Mean                                                | 16.5 (14.1-18.9) <sup>§</sup>   | 16.8 (13.9-19.7)      | 11.6 (9.75-13.5) <sup>‡</sup>     |
| Total <i>trans</i> 3'-hydroxycotinine (nmol/mL)     |                                 |                       |                                   |
| Median                                              | 9.17 (4.19-20.8) <sup>§</sup>   | 14.1 (6.29-28.3)      | 5.32 (1.82-12.1) <sup>‡</sup>     |
| Mean                                                | 15.4 (12.0-18.9) <sup>‡§</sup>  | 20.7 (16.4-24.9)      | 8.55 (6.64-10.5) <sup>‡</sup>     |
| Nicotine equivalents* (nmol/mL)                     |                                 |                       |                                   |
| Median                                              | 34.6 (19.7-57.9) <sup>§</sup>   | 36.0 (23.6-59.0)      | 26.7 (15.1-38.2)                  |
| Mean                                                | 43.6 (37.1-50.1) <sup>§</sup>   | 47.2 (39.6-54.9)      | 30.7 (26.5-34.9) <sup>‡</sup>     |
| Nicotine equivalents per CPD <sup>†</sup> (nmol/mL) |                                 |                       |                                   |
| Median                                              | 1.79 (0.98-2.88) <sup>§</sup>   | 1.59 (1.09-2.72)      | 1.51 (0.89-2.39)                  |
| Mean                                                | 2.44 (2.01-2.86)                | 2.16 (1.83-2.49)      | 1.90 (1.64-2.17)                  |
| Total 3-HC : total COT                              |                                 |                       |                                   |
| Median                                              | 0.85 (0.33-1.21) <sup>‡§</sup>  | 1.14 (0.60-1.79)      | 0.47 (0.20-1.02) <sup>‡</sup>     |
| Mean                                                | 0.97 (0.80-1.13) <sup>‡§</sup>  | 1.51 (1.13-1.90)      | 0.94 (0.54-1.33) <sup>‡</sup>     |
| <b>Males</b>                                        |                                 |                       |                                   |
| Total nicotine                                      |                                 |                       |                                   |
| Median                                              | 13.0 (5.57-20.2)                | 8.98 (5.76-19.6)      | 10.3 (5.21-17.8)                  |
| Mean                                                | 15.2 (12.7-17.7)                | 13.8 (11.2-16.3)      | 14.3 (11.5-17.1)                  |
| Total cotinine                                      |                                 |                       |                                   |
| Median                                              | 14.6 (10.6-27.7) <sup>§</sup>   | 15.7 (9.24-28.2)      | 11.6 (6.36-18.6) <sup>‡</sup>     |
| Mean                                                | 20.0 (17.0-23.1) <sup>§</sup>   | 22.3 (18.6-26.1)      | 15.2 (12.6-17.8) <sup>‡</sup>     |
| Total <i>trans</i> 3'-hydroxycotinine               |                                 |                       |                                   |
| Median                                              | 12.9 (5.04-25.0) <sup>§</sup>   | 13.9 (6.95-32.9)      | 5.93 (2.37-12.2) <sup>‡</sup>     |
| Mean                                                | 21.0 (15.0-26.9) <sup>§</sup>   | 25.7 (19.7-31.6)      | 10.8 (7.92-13.7) <sup>‡</sup>     |
| Nicotine equivalents                                |                                 |                       |                                   |
| Median                                              | 45.0 (27.5-70.1) <sup>§</sup>   | 41.5 (24.3-75.9)      | 29.1 (18.4-49.5) <sup>‡</sup>     |
| Mean                                                | 56.2 (46.4-65.9) <sup>§</sup>   | 61.8 (50.4-73.1)      | 40.2 (33.6-46.8) <sup>‡</sup>     |
| Nicotine equivalents per CPD                        |                                 |                       |                                   |
| Median                                              | 2.24 (1.18-3.34) <sup>‡§</sup>  | 1.62 (0.96-2.96)      | 1.46 (0.82-2.29)                  |
| Mean                                                | 2.64 (2.20-3.09) <sup>§</sup>   | 2.52 (1.96-3.09)      | 1.88 (1.56-2.19)                  |
| Total 3-HC : total COT                              |                                 |                       |                                   |
| Median                                              | 0.64 (0.39-1.46)                | 0.95 (0.64-1.47)      | 0.51 (0.28-0.94) <sup>‡</sup>     |
| Mean                                                | 1.00 (0.82-1.18) <sup>‡§</sup>  | 1.19 (0.98-1.39)      | 0.77 (0.62-0.92) <sup>‡</sup>     |

\*Nicotine equivalents are sum of total nicotine, total cotinine, and total *trans* 3'-hydroxycotinine (3-HC).

<sup>†</sup>Nicotine equivalents divided by average cigarette intake per day (CPD). CPD is estimated by averaging over the three days preceding the 12-hour urine collection.

<sup>‡</sup>P-value for comparison to whites is <0.05 (except p=0.06 for comparison of nicotine equivalents per CPD between Native Hawaiian and white men). P-values computed by one-way nonparametric analysis.

<sup>§</sup>P-value for comparison to Japanese Americans is <0.05 (except p=0.06 for comparison among females of both median nicotine equivalents and median nicotine equivalents per CPD). P-values computed by one-way nonparametric analysis.
